# Supplementary material for: Overall proportion of orthorexia nervosa symptoms: A systematic review and meta-analysis including 30 476 individuals from 18 countries
Source: PubMed Central journal article supplement (PMC10622118; doi:10.7189/jogh.13.04087), 2023-11-03
Supplement: jogh-13-04087-s001.pdf [file jogh-13-04087-s001.pdf]

**Figure S1.** Doi plots for Luis Furuya-Kanamori index. LFK – Luis Furuya-Kanamori, ON – orthorexia nervosa.

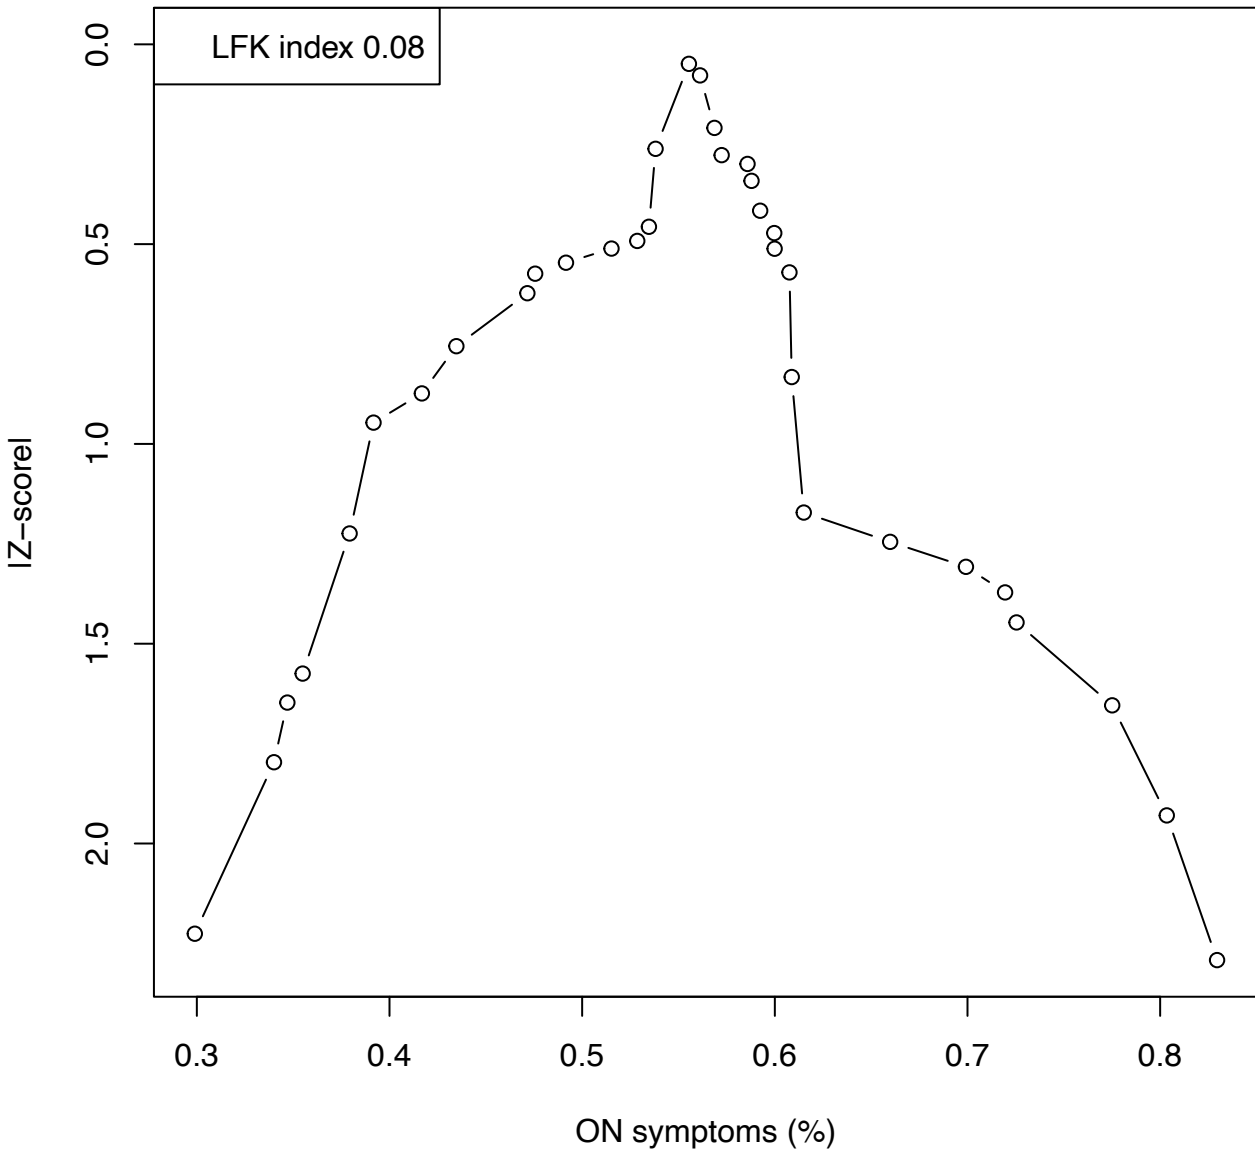

**Figure S2.** Overall proportion of orthorexia nervosa symptoms (using the cut-off <40 points). CI – confidence interval, n – sample,  $I^2$  – heterogeneity statistic,  $P$  – P value.

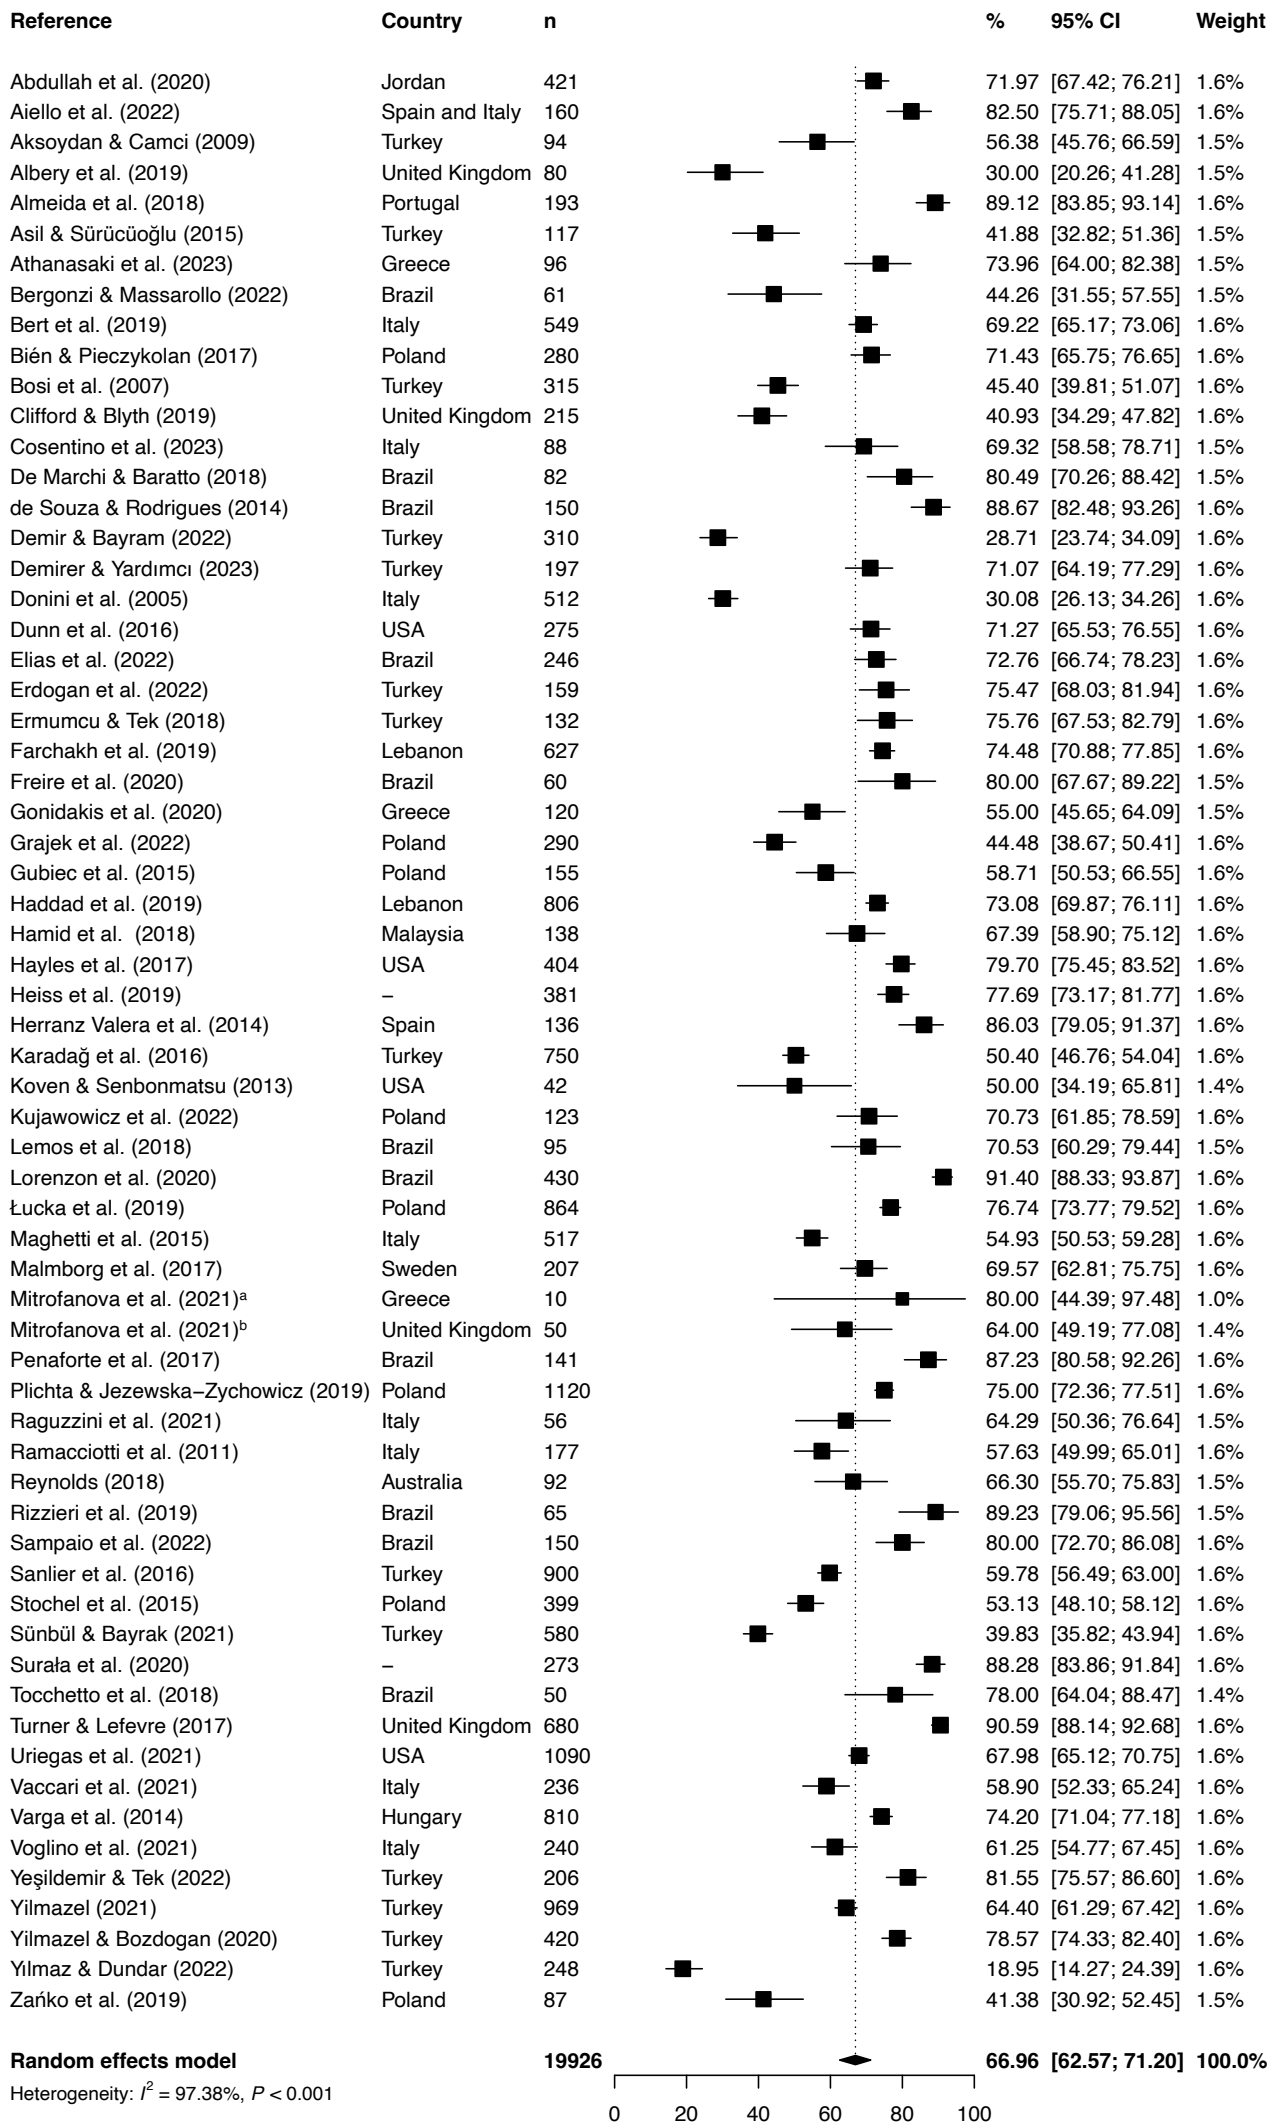

**Figure S3.** Overall proportion of orthorexia nervosa symptoms (using the cut-off <35 points) according to the representativeness of the sample.  $\chi^2$  – chi-squared test, CI – confidence interval, df – degrees of freedom, n – sample,  $I^2$  – heterogeneity statistic,  $P$  – P value.

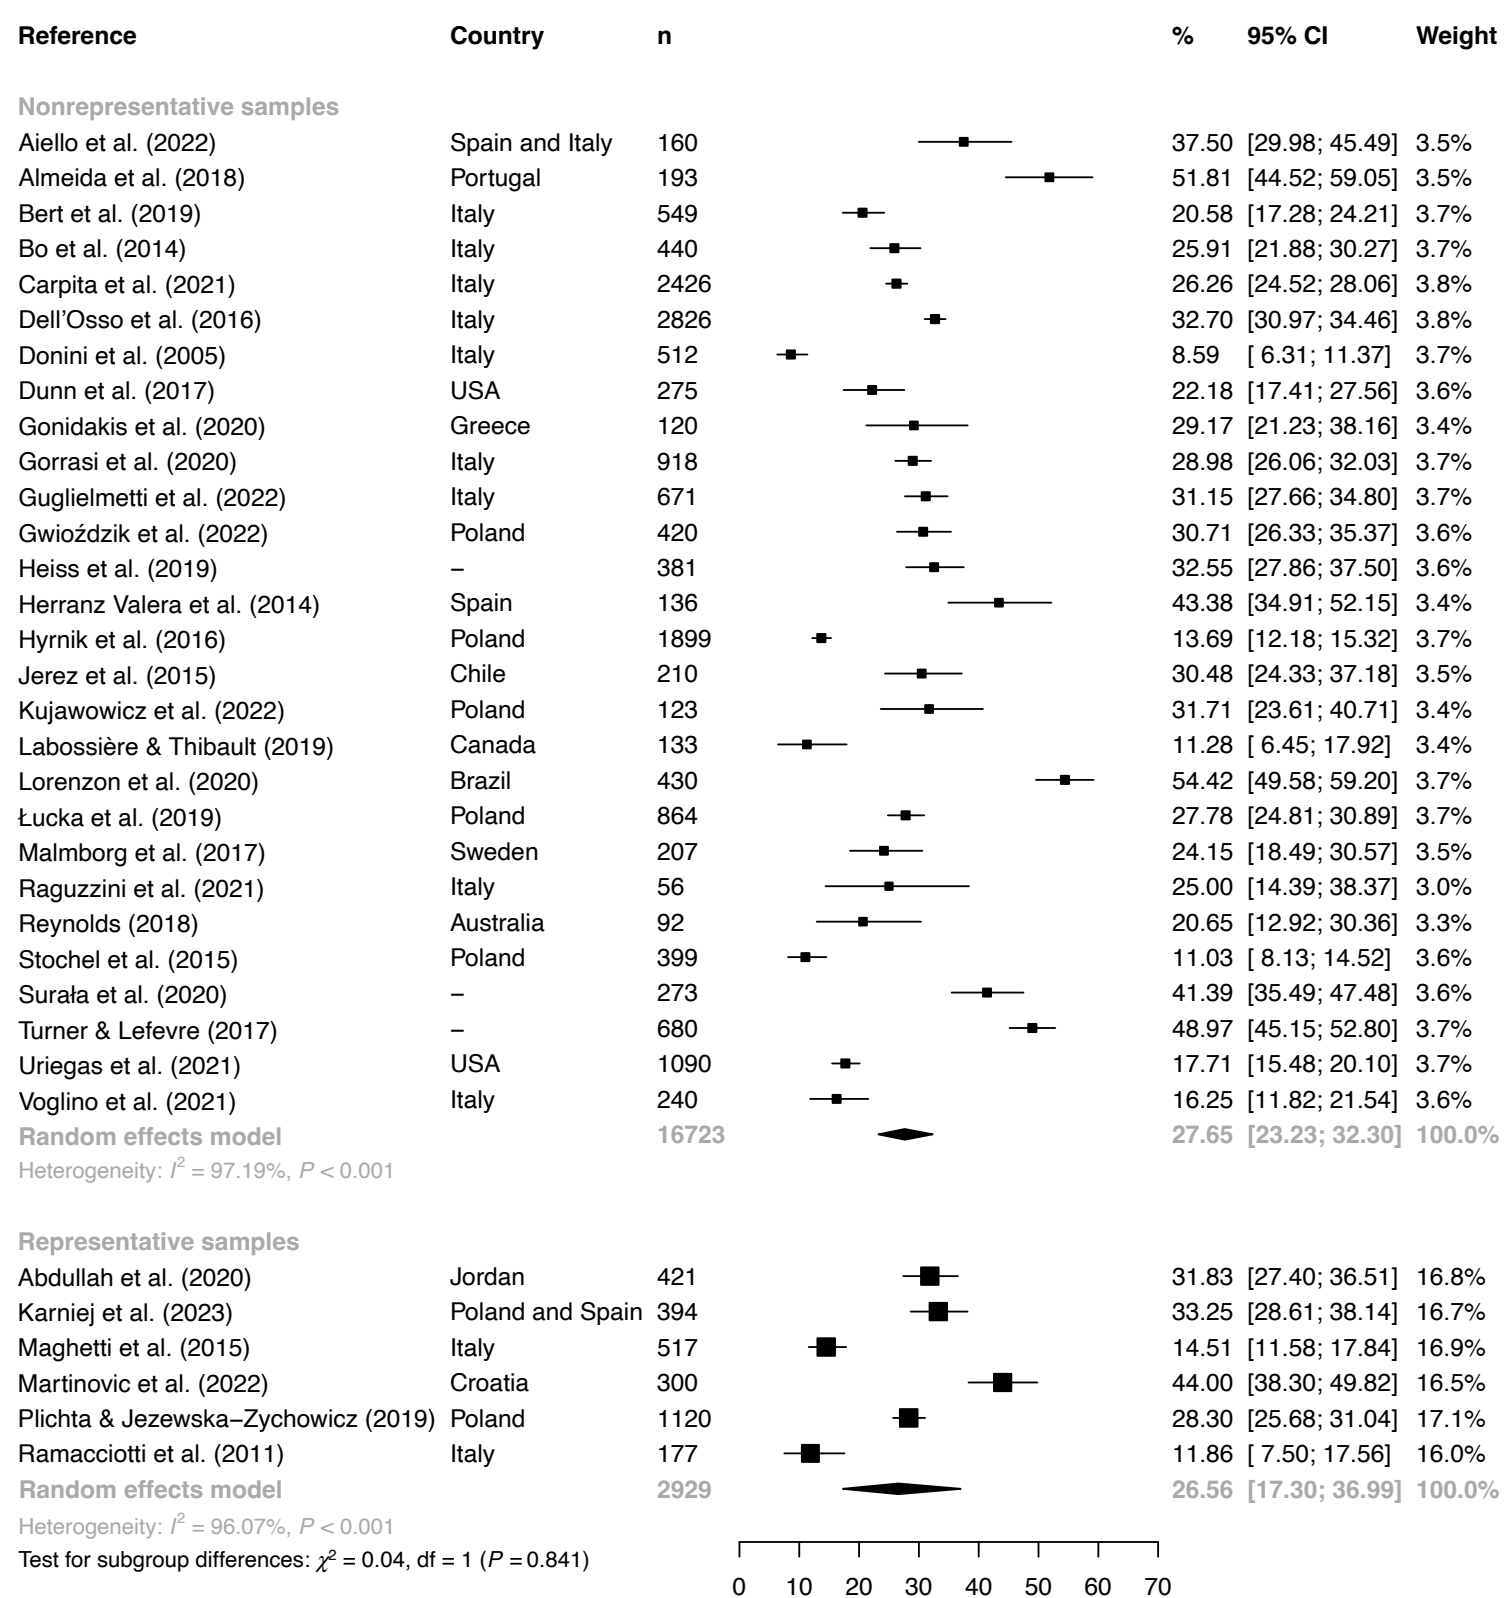

**Table S1.** Search strategy.

|                                                                                                                                                                                                                                                                                     |
|-------------------------------------------------------------------------------------------------------------------------------------------------------------------------------------------------------------------------------------------------------------------------------------|
| Databases searched until 26th June 2023.                                                                                                                                                                                                                                            |
| Strategy for Web of Science:<br>Final search: TS=((Orthorexia OR "Orthorexia nervosa" OR "Orthorexic behaviors") AND ORTO-15) (No limitations were used).                                                                                                                           |
| <b>Results: 129</b>                                                                                                                                                                                                                                                                 |
| Strategy for PubMed: ("Orthorexia nervosa"[MeSH Terms] OR ("orthorexia"[All Fields] AND "nervosa"[All Fields]) OR "Orthorexia nervosa"[All Fields] OR "orthorexia"[All Fields] OR "Orthorexia nervosa"[All Fields] OR "Orthorexic behaviors"[All Fields]) AND "ORTO-15"[All Fields] |
| <b>Results: 107</b>                                                                                                                                                                                                                                                                 |
| Strategy for SCOPUS: (orthorexia nervosa OR orthorexic behaviour OR orthorexia) AND (orto-15) (No limitations were used).                                                                                                                                                           |
| <b>Results: 366</b>                                                                                                                                                                                                                                                                 |
| Strategy for Cochrane: (Orthorexia):ti,ab,kw OR (Orthorexia nervosa):ti,ab,kw OR (Orthorexic behaviors):ti,ab,kw AND (ORTO-15):ti,ab,kw                                                                                                                                             |
| <b>Results: 8</b>                                                                                                                                                                                                                                                                   |

**Table 2.** Excluded studies with reasons.

|                                                                                                                                                                                                                                                                                                                                                                                                              |
|--------------------------------------------------------------------------------------------------------------------------------------------------------------------------------------------------------------------------------------------------------------------------------------------------------------------------------------------------------------------------------------------------------------|
| Aktürk, Ü., Gül, E., & Erci, B. (2019). The Effect of Orthorexia Nervosa Levels of Nursing Students and Diet Behaviors and Socio-Demographic Characteristics. <i>Ecology of Food and Nutrition</i> , 58(4), 397–409. <a href="https://doi.org/10.1080/03670244.2019.1602529">https://doi.org/10.1080/03670244.2019.1602529</a>                                                                               |
| Reason for exclusion: ORTO cut-off point different than < 40 or < 35.                                                                                                                                                                                                                                                                                                                                        |
| Alvarenga, M. S., Martins, M. C. T., Sato, K. S. C. J., Vargas, S. V. A., Philippi, S. T., & Scagliusi, F. B. (2012). Orthorexia nervosa behavior in a sample of Brazilian dietitians assessed by the Portuguese version of ORTO-15. <i>Eating and Weight Disorders: EWD</i> , 17(1), e29-35. <a href="https://doi.org/10.1007/BF03325325">https://doi.org/10.1007/BF03325325</a>                            |
| Reason for exclusion: Proportion of disordered eating not shown.                                                                                                                                                                                                                                                                                                                                             |
| Babeau, C., Le Chevanton, T., Julien-Sweerts, S., Brochenin, A., Donini, L. M., & Fouques, D. (2020). Structural validation of the ORTO-12-FR questionnaire among a French sample as a first attempt to assess orthorexia nervosa in France. <i>Eating and Weight Disorders: EWD</i> , 25(6), 1771–1778. <a href="https://doi.org/10.1007/s40519-019-00835-0">https://doi.org/10.1007/s40519-019-00835-0</a> |
| Reason for exclusion: Proportion of disordered eating not shown.                                                                                                                                                                                                                                                                                                                                             |
| Barnes, M. A., & Caltabiano, M. L. (2017). The interrelationship between orthorexia nervosa, perfectionism, body image and attachment style. <i>Eating and Weight Disorders: EWD</i> , 22(1), 177–184. <a href="https://doi.org/10.1007/s40519-016-0280-x">https://doi.org/10.1007/s40519-016-0280-x</a>                                                                                                     |
| Reason for exclusion: Proportion of disordered eating not shown.                                                                                                                                                                                                                                                                                                                                             |
| Barnett, M. J., Dripps, W. R., & Blomquist, K. K. (2016). Organivore or organorexic? Examining the relationship between alternative food network engagement, disordered eating, and special diets. <i>Appetite</i> , 105, 713–720. <a href="https://doi.org/10.1016/j.appet.2016.07.008">https://doi.org/10.1016/j.appet.2016.07.008</a>                                                                     |
| Reason for exclusion: Proportion of disordered eating not shown.                                                                                                                                                                                                                                                                                                                                             |
| Barrada, J. R., & Roncero, M. (2018). Bidimensional Structure of the Orthorexia: Development and Initial Validation of a New Instrument. <i>Anales de Psicología</i> , 34(2), 282–290. <a href="https://doi.org/10.6018/analesps.34.2.299671">https://doi.org/10.6018/analesps.34.2.299671</a>                                                                                                               |
| Reason for exclusion: Proportion of disordered eating not shown.                                                                                                                                                                                                                                                                                                                                             |
| Brytek-Matera, A., Plasonja, N., & Décamps, G. (2020). Assessing Orthorexia Nervosa: Validation of the Polish Version of the Eating Habits Questionnaire in a General Population Sample. <i>Nutrients</i> , 12(12). <a href="https://doi.org/10.3390/nu12123820">https://doi.org/10.3390/nu12123820</a>                                                                                                      |
| Reason for exclusion: Proportion of disordered eating not shown.                                                                                                                                                                                                                                                                                                                                             |
| Brytek-Matera, A. (2020). Interaction between Vegetarian Versus Omnivorous Diet and Unhealthy Eating Patterns (Orthorexia Nervosa, Cognitive Restraint) and Body Mass Index in Adults. <i>Nutrients</i> , 12(3), 646. <a href="https://doi.org/10.3390/nu12030646">https://doi.org/10.3390/nu12030646</a>                                                                                                    |
| Reason for exclusion: No ORTO-15 used.                                                                                                                                                                                                                                                                                                                                                                       |
| Brytek-Matera, A., Donini, L. M., Krupa, M., Poggiogalle, E., & Hay, P. (2015). Orthorexia nervosa and self-attitudinal aspects of body image in female and male university students. <i>Journal of Eating Disorders</i> , 3, 2. <a href="https://doi.org/10.1186/s40337-015-0038-2">https://doi.org/10.1186/s40337-015-0038-2</a>                                                                           |
| Reason for exclusion: ORTO cut-off point different than < 40 or < 35.                                                                                                                                                                                                                                                                                                                                        |
| Brytek-Matera, A., Fonte, M. L., Poggiogalle, E., Donini, L. M., & Cena, H. (2017). Orthorexia nervosa: Relationship with obsessive-compulsive symptoms, disordered eating patterns and body uneasiness among Italian university students. <i>Eating and Weight Disorders: EWD</i> , 22(4), 609–617. <a href="https://doi.org/10.1007/s40519-017-0427-4">https://doi.org/10.1007/s40519-017-0427-4</a>       |
| Reason for exclusion: Proportion of disordered eating not shown.                                                                                                                                                                                                                                                                                                                                             |
| Brytek-Matera, A., Krupa, M., Poggiogalle, E., & Donini, L. M. (2014). Adaptation of the ORTHO-15 test to Polish women and men. <i>Eating and Weight Disorders: EWD</i> , 19(1), 69–76. <a href="https://doi.org/10.1007/s40519-014-0100-0">https://doi.org/10.1007/s40519-014-0100-0</a>                                                                                                                    |
| Reason for exclusion: Proportion of disordered eating not shown.                                                                                                                                                                                                                                                                                                                                             |

|                                                                                                                                                                                                                                                                                                                                                                                                                        |
|------------------------------------------------------------------------------------------------------------------------------------------------------------------------------------------------------------------------------------------------------------------------------------------------------------------------------------------------------------------------------------------------------------------------|
| Brytek-Matera, A., Pardini, S., Szubert, J., & Novara, C. (2022). Orthorexia Nervosa and Disordered Eating Attitudes, Self-Esteem and Physical Activity among Young Adults. <i>Nutrients</i> , 14(6), 1289. <a href="https://doi.org/10.3390/nu14061289">https://doi.org/10.3390/nu14061289</a>                                                                                                                        |
| Reason for exclusion: No ORTO-15 used.                                                                                                                                                                                                                                                                                                                                                                                 |
| Brytek-Matera, A., Sacre, H., Staniszewska, A., & Hallit, S. (2020). The Prevalence of Orthorexia Nervosa in Polish and Lebanese Adults and Its Relationship with Sociodemographic Variables and BMI Ranges: A Cross-Cultural Perspective. <i>Nutrients</i> , 12(12), 3865. <a href="https://doi.org/10.3390/nu12123865">https://doi.org/10.3390/nu12123865</a>                                                        |
| Reason for exclusion: No ORTO-15 used.                                                                                                                                                                                                                                                                                                                                                                                 |
| Brytek-Matera, A., Staniszewska, A., & Hallit, S. (2020). Identifying the Profile of Orthorexic Behavior and “Normal” Eating Behavior with Cluster Analysis: A Cross-Sectional Study among Polish Adults. <i>Nutrients</i> , 12(11), 3490. <a href="https://doi.org/10.3390/nu12113490">https://doi.org/10.3390/nu12113490</a>                                                                                         |
| Reason for exclusion: No ORTO-15 used.                                                                                                                                                                                                                                                                                                                                                                                 |
| Brytek-Matera A, Obeid S, Donini LM, Rogoza M, Marchlewska M, Plichta M, et al. Psychometric properties of the ORTO-R in a community-based sample of women and men from Poland. <i>Journal of Eating Disorders</i> . 2023 Jan 19;11(1):9                                                                                                                                                                               |
| Reason for exclusion: No ORTO-15 used.                                                                                                                                                                                                                                                                                                                                                                                 |
| Brytek-Matera, A., Obeid, S., Donini, L. M., Rogoza, M., Marchlewska, M., Plichta, M., Jezewska-Zychowicz, M., Hallit, S., & Rogoza, R. (2023). Psychometric properties of the ORTO-R in a community-based sample of women and men from Poland. <i>Journal of Eating Disorders</i> , 11(1), Art. 1. <a href="https://doi.org/10.1186/s40337-023-00734-x">https://doi.org/10.1186/s40337-023-00734-x</a>                |
| Reason for exclusion: No ORTO-15 used.                                                                                                                                                                                                                                                                                                                                                                                 |
| Busatta, D., Cassioli, E., Rossi, E., Campanino, C., Ricca, V., & Rotella, F. (2022). Orthorexia among patients with eating disorders, student dietitians and general population: A pilot study. <i>Eating and Weight Disorders: EWD</i> , 27(2), 847–851. <a href="https://doi.org/10.1007/s40519-021-01184-7">https://doi.org/10.1007/s40519-021-01184-7</a>                                                         |
| Reason for exclusion: Proportion of disordered eating not shown.                                                                                                                                                                                                                                                                                                                                                       |
| Carlucci, L., Cinosi, E., Lupi, M., Matarazzo, I., Acciavatti, T., Sarchione, F., Santacroce, R., Martinotti, G., Giannantonio, M., D'Ambrosio, I., & Balsamo, M. (2016). L'ossessione del mangiare sano: La misurazione dell'«ortoressia nervosa» attraverso la scala Ortho-15. <i>Psicoterapia Cognitiva e Comportamentale</i> , 22, 367–372.                                                                        |
| Reason for exclusion: Excluded due to data unavailability.                                                                                                                                                                                                                                                                                                                                                             |
| Cena, H., Porri, D., De Giuseppe, R., Kalmpourtzidou, A., Salvatore, F. P., El Ghoch, M., Itani, L., Kreidieh, D., Brytek-Matera, A., Pocol, C. B., Arteta Arteta, D. S., Utan, G., & Kolčić, I. (2021). How Healthy Are Health-Related Behaviors in University Students: The HOLISTic Study. <i>Nutrients</i> , 13(2), Article 2. <a href="https://doi.org/10.3390/nu13020675">https://doi.org/10.3390/nu13020675</a> |
| Reason for exclusion: Proportion of disordered eating not shown.                                                                                                                                                                                                                                                                                                                                                       |
| Cerolini, S., Vacca, M., Zagaria, A., Donini, L. M., Barbaranelli, C., & Lombardo, C. (2022). Italian adaptation of the Düsseldorf Orthorexia Scale (I-DOS): Psychometric properties and prevalence of orthorexia nervosa among an Italian sample. <i>Eating and Weight Disorders</i> , 27(4), 1405-1413. <a href="https://doi.org/10.1007/s40519-021-01278-2">https://doi.org/10.1007/s40519-021-01278-2</a>          |
| Reason for exclusion: Proportion of disordered eating not shown.                                                                                                                                                                                                                                                                                                                                                       |
| Dąbal, A. (2020). Characteristics and nosological separation of orthorexia nervosa. <i>Psychiatria i Psychologia Kliniczna</i> , 20, 32–42. <a href="https://doi.org/10.15557/PiPK.2020.0004">https://doi.org/10.15557/PiPK.2020.0004</a>                                                                                                                                                                              |
| Reason for exclusion: ORTO cut-off point different than < 40 or < 35.                                                                                                                                                                                                                                                                                                                                                  |
| Dalga, D., & Yilmaz, H. O. (2021). The effect of nutrition education given to healthcare professionals on orthorexia nervosa. <i>Progress in Nutrition</i> , 23(2). <a href="https://doi.org/10.23751/pn.v23i2.10517">https://doi.org/10.23751/pn.v23i2.10517</a>                                                                                                                                                      |
| Reason for exclusion: ORTO cut-off point different than < 40 or < 35.                                                                                                                                                                                                                                                                                                                                                  |

|                                                                                                                                                                                                                                                                                                                                                                                                                                                                                                                                                       |
|-------------------------------------------------------------------------------------------------------------------------------------------------------------------------------------------------------------------------------------------------------------------------------------------------------------------------------------------------------------------------------------------------------------------------------------------------------------------------------------------------------------------------------------------------------|
| Dell'Osso, L., Carpita, B., Muti, D., Cremonese, I. M., Massimetti, G., Diadema, E., Gesi, C., & Carmassi, C. (2018). Prevalence and characteristics of orthorexia nervosa in a sample of university students in Italy. <i>Eating and Weight Disorders: EWD</i> , 23(1), 55-65. <a href="https://doi.org/10.1007/s40519-017-0460-3">https://doi.org/10.1007/s40519-017-0460-3</a>                                                                                                                                                                     |
| Reason for exclusion: Duplicated data.                                                                                                                                                                                                                                                                                                                                                                                                                                                                                                                |
| Demir, H. P., & Bayram, H. M. (2022). Orthorexia nervosa: The relationship with obsessive-compulsive symptoms and eating attitudes among individuals with and without healthcare professionals. <i>Mediterranean Journal of Nutrition and Metabolism</i> , 15(1), 23–33. <a href="https://doi.org/10.3233/MNM-210015">https://doi.org/10.3233/MNM-210015</a>                                                                                                                                                                                          |
| Reason for exclusion: Excluded due to data unavailability.                                                                                                                                                                                                                                                                                                                                                                                                                                                                                            |
| Duradoni, M., Gursesli, M. C., Fiorenza, M., & Guazzini, A. (2023). The Relationship between Orthorexia Nervosa and Obsessive Compulsive Disorder. <i>European Journal of Investigation in Health, Psychology and Education</i> , 13(5), 861-869. <a href="https://doi.org/10.3390/ejihpe13050065">https://doi.org/10.3390/ejihpe13050065</a>                                                                                                                                                                                                         |
| Reason for exclusion: No ORTO-15 used.                                                                                                                                                                                                                                                                                                                                                                                                                                                                                                                |
| Duran, S., Çiçekoğlu, P., & Kaya, E. (2020). Relationship between orthorexia nervosa, muscle dysmorphic disorder (bigorexia), and self-confidence levels in male students. <i>Perspectives in Psychiatric Care</i> , 56(4), 878–884. <a href="https://doi.org/10.1111/ppc.12505">https://doi.org/10.1111/ppc.12505</a>                                                                                                                                                                                                                                |
| Reason for exclusion: ORTO cut-off point different than < 40 or < 35.                                                                                                                                                                                                                                                                                                                                                                                                                                                                                 |
| Duran, S., & Öz, Y. C. (2022). The relationships between Orthorexia nervosa, social appearance anxiety and women's self-esteem: A cross-sectional study. <i>Bangladesh Journal of Medical Science</i> , 21(3), Article 3. <a href="https://doi.org/10.3329/bjms.v21i3.59584">https://doi.org/10.3329/bjms.v21i3.59584</a>                                                                                                                                                                                                                             |
| Reason for exclusion: ORTO cut-off point different than < 40 or < 35.                                                                                                                                                                                                                                                                                                                                                                                                                                                                                 |
| Elhabashy, S. A., Abd ElMalak, M. W., Elrassas, H. H., & Thabet, R. A. (2022). Disordered eating and behaviors among young Egyptians with type 1 diabetes: Risk factors and comorbidities. <i>Journal of Pediatric Endocrinology &amp; Metabolism: JPEM</i> , 35(11), 1385–1393. <a href="https://doi.org/10.1515/jpem-2022-0336">https://doi.org/10.1515/jpem-2022-0336</a>                                                                                                                                                                          |
| Reason for exclusion: Excluded due to data unavailability.                                                                                                                                                                                                                                                                                                                                                                                                                                                                                            |
| Gerontidis, A., Grammatikopoulou, M. G., Tzimos, C., Gkiouras, K., Taousani, E., Athanasiadis, L., & Goulis, D. G. (2022). Effectors of Pregorexia and Emesis among Pregnant Women: A Pilot Study. <i>Nutrients</i> , 14(24), Article 24. <a href="https://doi.org/10.3390/nu14245275">https://doi.org/10.3390/nu14245275</a>                                                                                                                                                                                                                         |
| Reason for exclusion: Proportion of disordered eating not shown.                                                                                                                                                                                                                                                                                                                                                                                                                                                                                      |
| Gkiouras, K., Grammatikopoulou, M. G., Tsaliki, T., Ntwali, L., Nigdelis, M. P., Gerontidis, A., Taousani, E., Tzimos, C., Rogoza, R., Bogdanos, D. P., Donini, L. M., & Goulis, D. G. (2022). Orthorexia nervosa: Replication and validation of the ORTO questionnaires translated into Greek in a survey of 848 Greek individuals. <i>Hormones (Athens, Greece)</i> , 21(2), 251–260. <a href="https://doi.org/10.1007/s42000-022-00351-4">https://doi.org/10.1007/s42000-022-00351-4</a>                                                           |
| Reason for exclusion: Proportion of disordered eating not shown.                                                                                                                                                                                                                                                                                                                                                                                                                                                                                      |
| Gorrasi, I. S. R., Ferraris, C., Degan, R., Daga, G. A., Bo, S., Tagliabue, A., Guglielmetti, M., Roppolo, M., Gilli, G., Maran, D. A., & Carraro, E. (2022). Use of online and paper-and-pencil questionnaires to assess the distribution of orthorexia nervosa, muscle dysmorphia and eating disorders among university students: Can different approaches lead to different results? <i>Eating and Weight Disorders: EWD</i> , 27(3), 989–999. <a href="https://doi.org/10.1007/s40519-021-01231-3">https://doi.org/10.1007/s40519-021-01231-3</a> |
| Reason for exclusion: Proportion of disordered eating not shown.                                                                                                                                                                                                                                                                                                                                                                                                                                                                                      |
| Grajek, M., Kobza, J., Sobczyk, K., Działach, E., Białek-Dratwa, A., Górski, M., & Sas-Nowosielski, K. (2020). Dietary habits and orthorexic behaviours of dancing school female students. <i>Journal of Physical Education and Sport</i> , 3102–3107. <a href="https://doi.org/10.7752/jpes.2020.s6421">https://doi.org/10.7752/jpes.2020.s6421</a>                                                                                                                                                                                                  |
| Reason for exclusion: ORTO cut-off point different than < 40 or < 35.                                                                                                                                                                                                                                                                                                                                                                                                                                                                                 |
| Gramaglia, C., Brytek-Matera, A., Rogoza, R., & Zeppegno, P. (2017). Orthorexia and anorexia nervosa: Two distinct phenomena? A cross-cultural comparison of orthorexic behaviours in clinical and non-clinical samples. <i>BMC Psychiatry</i> , 17(1), 75. <a href="https://doi.org/10.1186/s12888-017-1241-2">https://doi.org/10.1186/s12888-017-1241-2</a>                                                                                                                                                                                         |

|                                                                                                                                                                                                                                                                                                                                                                                                                                                            |
|------------------------------------------------------------------------------------------------------------------------------------------------------------------------------------------------------------------------------------------------------------------------------------------------------------------------------------------------------------------------------------------------------------------------------------------------------------|
| Reason for exclusion: Subjects with eating disorder.                                                                                                                                                                                                                                                                                                                                                                                                       |
| Gramaglia, C., Gambaro, E., Delicato, C., Marchetti, M., Sarchiapone, M., Ferrante, D., Roncero, M., Perpiñá, C., Brytek-Matera, A., Wojtyna, E., & Zeppugno, P. (2019). Orthorexia nervosa, eating patterns and personality traits: A cross-cultural comparison of Italian, Polish and Spanish university students. <i>BMC Psychiatry</i> , 19(1), 235. <a href="https://doi.org/10.1186/s12888-019-2208-2">https://doi.org/10.1186/s12888-019-2208-2</a> |
| Reason for exclusion: Proportion of disordered eating not shown.                                                                                                                                                                                                                                                                                                                                                                                           |
| Grammatikopoulou, M. G., Gkiouras, K., Markaki, A., Theodoridis, X., Tsakiri, V., Mavridis, P., Dardavessis, T., & Chourdakis, M. (2018). Food addiction, orthorexia, and food-related stress among dietetics students. <i>Eating and Weight Disorders: EWD</i> , 23(4), 459–467. <a href="https://doi.org/10.1007/s40519-018-0514-1">https://doi.org/10.1007/s40519-018-0514-1</a>                                                                        |
| Reason for exclusion: No ORTO-15 used.                                                                                                                                                                                                                                                                                                                                                                                                                     |
| Haddad, C., Hallit, R., Akel, M., Honein, K., Akiki, M., Kheir, N., Obeid, S., & Hallit, S. (2020). Validation of the Arabic version of the ORTO-15 questionnaire in a sample of the Lebanese population. <i>Eating and Weight Disorders: EWD</i> , 25(4), 951–960. <a href="https://doi.org/10.1007/s40519-019-00710-y">https://doi.org/10.1007/s40519-019-00710-y</a>                                                                                    |
| Reason for exclusion: Proportion of disordered eating not shown.                                                                                                                                                                                                                                                                                                                                                                                           |
| Hyrnik, J., Janas-Kozik, M., Stochel, M., Jelonek, I., Siwiec, A., Krysta, K., & Rybakowski, J. K. (2016). Prevalence of orthorexia nervosa among polish adolescents – Assessment made by the ORTO-15 Questionnaire. <i>European Psychiatry</i> , 33, S430. <a href="https://doi.org/10.1016/j.eurpsy.2016.01.1555">https://doi.org/10.1016/j.eurpsy.2016.01.1555</a>                                                                                      |
| Reason for exclusion: Duplicated data.                                                                                                                                                                                                                                                                                                                                                                                                                     |
| James, C., Harrison, A., Seixas, A., Powell, M., Pengpid, S., & Peltzer, K. (2017). “Safe Foods” or “Fear Foods”: The implications of food avoidance in college students from low- and middle-income countries. <i>Eating and Weight Disorders: EWD</i> , 22(3), 407–419. <a href="https://doi.org/10.1007/s40519-017-0407-8">https://doi.org/10.1007/s40519-017-0407-8</a>                                                                                |
| Reason for exclusion: No ORTO-15 used.                                                                                                                                                                                                                                                                                                                                                                                                                     |
| Kalika, E., Egan, H., & Mantzios, M. (2022). Exploring the role of mindful eating and self-compassion on eating behaviours and orthorexia in people following a vegan diet. <i>Eating and Weight Disorders: EWD</i> , 27(7), 2641–2651. <a href="https://doi.org/10.1007/s40519-022-01407-5">https://doi.org/10.1007/s40519-022-01407-5</a>                                                                                                                |
| Reason for exclusion: No ORTO-15 used.                                                                                                                                                                                                                                                                                                                                                                                                                     |
| Kamarli Altun, H., Keser, I., & Bozkurt, S. (2020). Comparison of Eating Attitudes and the Susceptibility to Orthorexia Nervosa of Students in Health-Related Fields and Those in Other Fields. <i>Iranian Journal of Public Health</i> . <a href="https://ijph.tums.ac.ir/index.php/ijph/article/view/19878">https://ijph.tums.ac.ir/index.php/ijph/article/view/19878</a>                                                                                |
| Reason for exclusion: ORTO cut-off point different than < 40 or < 35.                                                                                                                                                                                                                                                                                                                                                                                      |
| Kaźmierczak-Wojtaś, N., & Drozd, M. (2022). Diet Quality and Level of Nutrition Knowledge among Young People with Orthorexic Tendencies. <i>Nutrients</i> , 14(20), Article 20. <a href="https://doi.org/10.3390/nu14204333">https://doi.org/10.3390/nu14204333</a>                                                                                                                                                                                        |
| Reason for exclusion: ORTO cut-off point different than < 40 or < 35.                                                                                                                                                                                                                                                                                                                                                                                      |
| Kaźmierczak-Wojtaś, N., Niedzielski, A., & Drozd, M. (2022). Orthorexic tendencies and the structure of achievement motivation in young people in Poland. <i>Nutrition</i> , 103–104, 111795. <a href="https://doi.org/10.1016/j.nut.2022.111795">https://doi.org/10.1016/j.nut.2022.111795</a>                                                                                                                                                            |
| Reason for exclusion: ORTO cut-off point different than < 40 or < 35.                                                                                                                                                                                                                                                                                                                                                                                      |
| Kaźmierczak-Wojtaś, N., Patryn, R., Zagaja, A., Drozd, M., & Niedzielski, A. (2021). Prevalence and Characteristics of Orthorectic Disorders in Adolescence and Young People: Polish Preliminary Studies. <i>Nutrients</i> , 13(5), Article 5. <a href="https://doi.org/10.3390/nu13051568">https://doi.org/10.3390/nu13051568</a>                                                                                                                         |
| Reason for exclusion: ORTO cut-off point different than < 40 or < 35.                                                                                                                                                                                                                                                                                                                                                                                      |
| Khalil, J., Boutros, S., Kheir, N., Kassem, M., Salameh, P., Sacre, H., Akel, M., Obeid, S., & Hallit, S. (2022). Eating disorders and their relationship with menopausal phases among a sample of middle-aged Lebanese women. <i>BMC Women’s Health</i> , 22(1), 153. <a href="https://doi.org/10.1186/s12905-022-01738-6">https://doi.org/10.1186/s12905-022-01738-6</a>                                                                                 |
| Reason for exclusion: Proportion of disordered eating not shown.                                                                                                                                                                                                                                                                                                                                                                                           |



|                                                                                                                                                                                                                                                                                                                                                                                                                                                                                                                                                        |
|--------------------------------------------------------------------------------------------------------------------------------------------------------------------------------------------------------------------------------------------------------------------------------------------------------------------------------------------------------------------------------------------------------------------------------------------------------------------------------------------------------------------------------------------------------|
| Li, W.-L., Tan, S.-X., Ouyang, R.-Q., Cui, Y.-F., Ma, J.-R., Cheng, C., Mu, Y.-J., Zhang, S.-W., Zheng, L., Xiong, P., Ni, W.-Z., Li, L.-Y., Fan, L.-N., Luo, Y.-M., Yu, Y.-L., Wang, Z.-M., Ding, F., Pan, Q.-F., Jiang, A.-Y., ... Zeng, F.-F. (2022). Translation and validation of the Chinese version of the orthorexia nervosa assessment questionnaires among college students. <i>Eating and Weight Disorders: EWD</i> , 27(8), 3389–3398. <a href="https://doi.org/10.1007/s40519-022-01469-5">https://doi.org/10.1007/s40519-022-01469-5</a> |
| Reason for exclusion: Proportion of disordered eating not shown.                                                                                                                                                                                                                                                                                                                                                                                                                                                                                       |
| Łucka, I., Janikowska-Hołoweńko, D., Domarecki, P., Plenikowska-Ślusarz, T., & Domarecka, M. (2019). Orthorexia nervosa—A separate clinical entity, a part of eating disorder spectrum or another manifestation of obsessive-compulsive disorder? <i>Psychiatria Polska</i> , 53(2), 371–382. <a href="https://doi.org/10.12740/PP/OnlineFirst/85729">https://doi.org/10.12740/PP/OnlineFirst/85729</a>                                                                                                                                                |
| Reason for exclusion: Duplicated data.                                                                                                                                                                                                                                                                                                                                                                                                                                                                                                                 |
| MacPhail, D. C. G., & Oberle, C. D. (2022). Seeing Shred: Differences in muscle dysmorphia, orthorexia nervosa, depression, and obsessive-compulsive tendencies among groups of weightlifting athletes. <i>Performance Enhancement &amp; Health</i> , 10(1), 100213. <a href="https://doi.org/10.1016/j.peh.2021.100213">https://doi.org/10.1016/j.peh.2021.100213</a>                                                                                                                                                                                 |
| Reason for exclusion: No ORTO-15 used.                                                                                                                                                                                                                                                                                                                                                                                                                                                                                                                 |
| Mavrandrea, P., & Gonidakis, F. (2022). Exercise dependence and orthorexia nervosa in Crossfit: Exploring the role of perfectionism. <i>Current Psychology (New Brunswick, N.J.)</i> , 1–9. <a href="https://doi.org/10.1007/s12144-022-03585-y">https://doi.org/10.1007/s12144-022-03585-y</a>                                                                                                                                                                                                                                                        |
| Reason for exclusion: ORTO cut-off point different than < 40 or < 35.                                                                                                                                                                                                                                                                                                                                                                                                                                                                                  |
| Meule, A., Holzapfel, C., Brandl, B., Greetfeld, M., Hessler-Kaufmann, J. B., Skurk, T., Quadflieg, N., Schlegl, S., Hauner, H., & Voderholzer, U. (2020). Measuring orthorexia nervosa: A comparison of four self-report questionnaires. <i>Appetite</i> , 146, 104512. <a href="https://doi.org/10.1016/j.appet.2019.104512">https://doi.org/10.1016/j.appet.2019.104512</a>                                                                                                                                                                         |
| Reason for exclusion: Proportion of disordered eating not shown.                                                                                                                                                                                                                                                                                                                                                                                                                                                                                       |
| Missbach, B., Hinterbuchinger, B., Dreiseitl, V., Zellhofer, S., Kurz, C., & König, J. (2015). When Eating Right, Is Measured Wrong! A Validation and Critical Examination of the ORTO-15 Questionnaire in German. <i>PLoS One</i> , 10(8), e0135772. <a href="https://doi.org/10.1371/journal.pone.0135772">https://doi.org/10.1371/journal.pone.0135772</a>                                                                                                                                                                                          |
| Reason for exclusion: ORTO cut-off point different than < 40 or < 35.                                                                                                                                                                                                                                                                                                                                                                                                                                                                                  |
| Moller, S., Apputhurai, P., & Knowles, S. R. (2019). Confirmatory factor analyses of the ORTO 15-, 11- and 9-item scales and recommendations for suggested cut-off scores. <i>Eating and Weight Disorders: EWD</i> , 24(1), 21–28. <a href="https://doi.org/10.1007/s40519-018-0515-0">https://doi.org/10.1007/s40519-018-0515-0</a>                                                                                                                                                                                                                   |
| Reason for exclusion: ORTO cut-off point different than < 40 or < 35.                                                                                                                                                                                                                                                                                                                                                                                                                                                                                  |
| Novara, C., Pardini, S., Visioli, F., & Meda, N. (2022). Orthorexia nervosa and dieting in a non-clinical sample: A prospective study. <i>Eating and Weight Disorders: EWD</i> , 27(6), 2081–2093. <a href="https://doi.org/10.1007/s40519-021-01353-8">https://doi.org/10.1007/s40519-021-01353-8</a>                                                                                                                                                                                                                                                 |
| Reason for exclusion: No ORTO-15 used.                                                                                                                                                                                                                                                                                                                                                                                                                                                                                                                 |
| Oberle, C. D., Marcell, H. S., & Noebel, N. A. (2022). Orthorexia nervosa and substance use for the purposes of weight control, conformity, and emotional coping. <i>Eating and Weight Disorders: EWD</i> , 27(2), 553–561. <a href="https://doi.org/10.1007/s40519-021-01190-9">https://doi.org/10.1007/s40519-021-01190-9</a>                                                                                                                                                                                                                        |
| Reason for exclusion: No ORTO-15 used.                                                                                                                                                                                                                                                                                                                                                                                                                                                                                                                 |
| Özgen, C., Köse, H., & Reyhan, S. (2021). Relationship between Exercise Addiction, Orthorexia Nervosa, and Sports Supplement Attitude in Turkish Fitness Participants. <i>Progress in Nutrition</i> , 23(4), Article 4. <a href="https://doi.org/10.23751/pn.v23i4.12482">https://doi.org/10.23751/pn.v23i4.12482</a>                                                                                                                                                                                                                                  |
| Reason for exclusion: No ORTO-15 used.                                                                                                                                                                                                                                                                                                                                                                                                                                                                                                                 |
| Parisi, L., La Grutta, S., BAIDO, R., Epifanio, M. S., Carotenuto, M., Operto, F. F., TESTA, D., Vetri, L., & ROCCELLA, M. (2022). Bigorexia and orthorexia: An indissoluble relationship? <i>Minerva Psychiatry</i> , 62. <a href="https://doi.org/10.23736/S2724-6612.20.02095-6">https://doi.org/10.23736/S2724-6612.20.02095-6</a>                                                                                                                                                                                                                 |
| Reason for exclusion: Excluded due to data unavailability.                                                                                                                                                                                                                                                                                                                                                                                                                                                                                             |

|                                                                                                                                                                                                                                                                                                                                                                                                                              |
|------------------------------------------------------------------------------------------------------------------------------------------------------------------------------------------------------------------------------------------------------------------------------------------------------------------------------------------------------------------------------------------------------------------------------|
| Parra-Fernandez, M. L., Rodríguez-Cano, T., Onieva-Zafra, M. D., Perez-Haro, M. J., Casero-Alonso, V., Muñoz Camargo, J. C., & Notario-Pacheco, B. (2018). Adaptation and validation of the Spanish version of the ORTO-15 questionnaire for the diagnosis of orthorexia nervosa. <i>PloS One</i> , 13(1), e0190722. <a href="https://doi.org/10.1371/journal.pone.0190722">https://doi.org/10.1371/journal.pone.0190722</a> |
| Reason for exclusion: ORTO cut-off point different than < 40 or < 35.                                                                                                                                                                                                                                                                                                                                                        |
| Plichta, M., & Jezewska-Zychowicz, M. (2020). Orthorexic Tendency and Eating Disorders Symptoms in Polish Students: Examining Differences in Eating Behaviors. <i>Nutrients</i> , 12(1), 218. <a href="https://doi.org/10.3390/nu12010218">https://doi.org/10.3390/nu12010218</a>                                                                                                                                            |
| Reason for exclusion: Duplicated data.                                                                                                                                                                                                                                                                                                                                                                                       |
| Plichta, M., Jezewska-Zychowicz, M., & Gębski, J. (2019). Orthorexic Tendency in Polish Students: Exploring Association with Dietary Patterns, Body Satisfaction and Weight. <i>Nutrients</i> , 11(1), 100. <a href="https://doi.org/10.3390/nu11010100">https://doi.org/10.3390/nu11010100</a>                                                                                                                              |
| Reason for exclusion: Duplicated data.                                                                                                                                                                                                                                                                                                                                                                                       |
| Plichta, M., Jezewska-Zychowicz, M., & Małachowska, A. (2020). Relationship between Psychosocial Impairment, Food Choice Motives, and Orthorexic Behaviors among Polish Adults. <i>Nutrients</i> , 12(5), 1218. <a href="https://doi.org/10.3390/nu12051218">https://doi.org/10.3390/nu12051218</a>                                                                                                                          |
| Reason for exclusion: Proportion of disordered eating not shown.                                                                                                                                                                                                                                                                                                                                                             |
| Pratt, V. B., Madigan, D. J., & Hill, A. P. (2022). Perfectionistic self-presentation and orthorexia in exercisers. <i>Eating and Weight Disorders: EWD</i> , 27(3), 1217–1221. <a href="https://doi.org/10.1007/s40519-021-01262-w">https://doi.org/10.1007/s40519-021-01262-w</a>                                                                                                                                          |
| Reason for exclusion: Proportion of disordered eating not shown.                                                                                                                                                                                                                                                                                                                                                             |
| Rodgers, R. F., White, M., & Berry, R. (2021). Orthorexia nervosa, intuitive eating, and eating competence in female and male college students. <i>Eating and Weight Disorders: EWD</i> , 26(8), 2625–2632. <a href="https://doi.org/10.1007/s40519-020-01054-8">https://doi.org/10.1007/s40519-020-01054-8</a>                                                                                                              |
| Reason for exclusion: ORTO cut-off point different than < 40 or < 35.                                                                                                                                                                                                                                                                                                                                                        |
| Rogoza, R., & Donini, L. M. (2021). Introducing ORTO-R: A revision of ORTO-15 : Based on the re-assessment of original data. <i>Eating and Weight Disorders: EWD</i> , 26(3), 887–895. <a href="https://doi.org/10.1007/s40519-020-00924-5">https://doi.org/10.1007/s40519-020-00924-5</a>                                                                                                                                   |
| Reason for exclusion: Proportion of disordered eating not shown.                                                                                                                                                                                                                                                                                                                                                             |
| Roncero, M., Barrada, J. R., & Perpiñá, C. (2017). Measuring Orthorexia Nervosa: Psychometric Limitations of the ORTO-15. <i>The Spanish Journal of Psychology</i> , 20, E41. <a href="https://doi.org/10.1017/sjp.2017.36">https://doi.org/10.1017/sjp.2017.36</a>                                                                                                                                                          |
| Reason for exclusion: Proportion of disordered eating not shown.                                                                                                                                                                                                                                                                                                                                                             |
| Sanlier, N., Pehlivan, M., Sabuncular, G., Bakan, S., & Isguzar, Y. (2018). Determining the relationship between body mass index, healthy lifestyle behaviors and social appearance anxiety. <i>Ecology of Food and Nutrition</i> , 57(2), 124–139. <a href="https://doi.org/10.1080/03670244.2017.1419343">https://doi.org/10.1080/03670244.2017.1419343</a>                                                                |
| Reason for exclusion: Proportion of disordered eating not shown.                                                                                                                                                                                                                                                                                                                                                             |
| Segura-García, C., Papaiani, M. C., Caglioti, F., Procopio, L., Nisticò, C. G., Bombardiere, L., Ammendolia, A., Rizza, P., De Fazio, P., & Capranica, L. (2012). Orthorexia nervosa: A frequent eating disordered behavior in athletes. <i>Eating and Weight Disorders: EWD</i> , 17(4), e226-233. <a href="https://doi.org/10.3275/8272">https://doi.org/10.3275/8272</a>                                                  |
| Reason for exclusion: Proportion of disordered eating not shown.                                                                                                                                                                                                                                                                                                                                                             |
| Sfeir, E., Haddad, C., Salameh, P., Sacre, H., Hallit, R., Akel, M., Honein, K., Akiki, M., Kheir, N., Obeid, S., & Hallit, S. (2021). Binge eating, orthorexia nervosa, restrained eating, and quality of life: A population study in Lebanon. <i>Eating and Weight Disorders: EWD</i> , 26(1), 145–158. <a href="https://doi.org/10.1007/s40519-019-00831-4">https://doi.org/10.1007/s40519-019-00831-4</a>                |
| Reason for exclusion: Proportion of disordered eating not shown.                                                                                                                                                                                                                                                                                                                                                             |

|                                                                                                                                                                                                                                                                                                                                                                                                                                                                                                  |
|--------------------------------------------------------------------------------------------------------------------------------------------------------------------------------------------------------------------------------------------------------------------------------------------------------------------------------------------------------------------------------------------------------------------------------------------------------------------------------------------------|
| Sifakaki M, Gkiouras K, Lindqvist HM, Marakis G, Petropoulou A, Donini LM, et al. Orthorexia Nervosa Practices in Rheumatoid Arthritis: The DORA Study. <i>Nutrients</i> . 2023 Jan 31;15(3):713                                                                                                                                                                                                                                                                                                 |
| Reason for exclusion: Proportion of disordered eating not shown.                                                                                                                                                                                                                                                                                                                                                                                                                                 |
| Tarı Selçuk, K., & Çevik, C. (2020). Use of dietary supplements among nursing students in Turkey in the last 12 months and its relation with orthorexia nervosa. <i>Perspectives in Psychiatric Care</i> , 56(4), 885–893. <a href="https://doi.org/10.1111/ppc.12507">https://doi.org/10.1111/ppc.12507</a>                                                                                                                                                                                     |
| Reason for exclusion: ORTO cut-off point different than < 40 or < 35.                                                                                                                                                                                                                                                                                                                                                                                                                            |
| Tóth-Király, I., Gajdos, P., Román, N., Vass, N., & Rigó, A. (2021). The associations between orthorexia nervosa and the sociocultural attitudes: The mediating role of basic psychological needs and health anxiety. <i>Eating and Weight Disorders: EWD</i> , 26(1), 125–134. <a href="https://doi.org/10.1007/s40519-019-00826-1">https://doi.org/10.1007/s40519-019-00826-1</a>                                                                                                              |
| Reason for exclusion: ORTO cut-off point different than < 40 or < 35.                                                                                                                                                                                                                                                                                                                                                                                                                            |
| Toti, E., Cavedon, V., Raguzzini, A., Fedullo, A. L., Milanese, C., Bernardi, E., Bellito, S., Bernardi, M., Sciarra, T., & Peluso, I. (2022). Dietary Intakes and Food Habits of Wheelchair Basketball Athletes Compared to Gym Attendees and Individuals who do not Practice Sport Activity. <i>Endocrine, Metabolic &amp; Immune Disorders Drug Targets</i> , 22(1), 38–48. <a href="https://doi.org/10.2174/1871530321666210208213046">https://doi.org/10.2174/1871530321666210208213046</a> |
| Reason for exclusion: Proportion of disordered eating not shown.                                                                                                                                                                                                                                                                                                                                                                                                                                 |
| Tremelling, K., Sandon, L., Vega, G. L., & McAdams, C. J. (2017). Orthorexia Nervosa and Eating Disorder Symptoms in Registered Dietitian Nutritionists in the United States. <i>Journal of the Academy of Nutrition and Dietetics</i> , 117(10), 1612–1617. <a href="https://doi.org/10.1016/j.jand.2017.05.001">https://doi.org/10.1016/j.jand.2017.05.001</a>                                                                                                                                 |
| Reason for exclusion: Subjects with eating disorder.                                                                                                                                                                                                                                                                                                                                                                                                                                             |
| Valente, M., Syurina, E. V., Muftugil-Yalcin, S., & Cesuroglu, T. (2020). “Keep Yourself Alive”: From Healthy Eating to Progression to Orthorexia Nervosa A Mixed Methods Study among Young Women in the Netherlands. <i>Ecology of Food and Nutrition</i> , 59(6), 578–597. <a href="https://doi.org/10.1080/03670244.2020.1755279">https://doi.org/10.1080/03670244.2020.1755279</a>                                                                                                           |
| Reason for exclusion: Proportion of disordered eating not shown.                                                                                                                                                                                                                                                                                                                                                                                                                                 |
| White, M., Berry, R., & Rodgers, R. F. (2020). Body image and body change behaviors associated with orthorexia symptoms in males. <i>Body Image</i> , 34, 46–50. <a href="https://doi.org/10.1016/j.bodyim.2020.05.003">https://doi.org/10.1016/j.bodyim.2020.05.003</a>                                                                                                                                                                                                                         |
| Reason for exclusion: ORTO cut-off point different than < 40 or < 35.                                                                                                                                                                                                                                                                                                                                                                                                                            |
| Worsfold, K. A., & Sheffield, J. K. (2021). Practitioner eating disorder detection: The influence of health mindset, thin-ideal internalization, orthorexia and gender role. <i>Early Intervention in Psychiatry</i> , 15(2), 296–305. <a href="https://doi.org/10.1111/eip.12940">https://doi.org/10.1111/eip.12940</a>                                                                                                                                                                         |
| Reason for exclusion: ORTO cut-off point different than < 40 or < 35.                                                                                                                                                                                                                                                                                                                                                                                                                            |
| Yakın, E., Obeid, S., Fekih-Romdhane, F., Soufia, M., Sawma, T., Samaha, S., Mhanna, M., Azzi, R., Mina, A., & Hallit, S. (2022). “In-between orthorexia” profile: The co-occurrence of pathological and healthy orthorexia among male and female non-clinical adolescents. <i>Journal of Eating Disorders</i> , 10(1), 155. <a href="https://doi.org/10.1186/s40337-022-00673-z">https://doi.org/10.1186/s40337-022-00673-z</a>                                                                 |
| Reason for exclusion: No ORTO-15 used.                                                                                                                                                                                                                                                                                                                                                                                                                                                           |
| Yakın, E., Raynal, P., & Chabrol, H. (2021). Distinguishing orthorexic behaviors from eating disordered and obsessive-compulsive behaviors: A typological study. <i>Eating and Weight Disorders: EWD</i> , 26(6), 2011–2019. <a href="https://doi.org/10.1007/s40519-020-01037-9">https://doi.org/10.1007/s40519-020-01037-9</a>                                                                                                                                                                 |
| Reason for exclusion: No ORTO-15 used.                                                                                                                                                                                                                                                                                                                                                                                                                                                           |
| Yazkan, G. (2021). The relationship between orthorexia nervosa tendencies and OCD symptoms in healthcare professionals. <i>Journal of Psychiatric Nursing</i> . <a href="https://doi.org/10.14744/phd.2021.87369">https://doi.org/10.14744/phd.2021.87369</a>                                                                                                                                                                                                                                    |
| Reason for exclusion: Proportion of disordered eating not shown.                                                                                                                                                                                                                                                                                                                                                                                                                                 |
| Yilmaz, F. C. (2023). Orthorexia and eating attitudes in health sciences students. <i>Nigerian Journal of Clinical Practice</i> , 26(4), 502-507. <a href="https://doi.org/10.4103/njcp.njcp_507_20">https://doi.org/10.4103/njcp.njcp_507_20</a>                                                                                                                                                                                                                                                |

|                                                                                                                                                                                                                                                                                                                                                                                                                                                  |
|--------------------------------------------------------------------------------------------------------------------------------------------------------------------------------------------------------------------------------------------------------------------------------------------------------------------------------------------------------------------------------------------------------------------------------------------------|
| Reason for exclusion: Proportion of disordered eating not shown.                                                                                                                                                                                                                                                                                                                                                                                 |
| Zakhour, M., Haddad, C., Sacre, H., Tarabay, C., Zeidan, R. K., Akel, M., Hallit, R., Kheir, N., Obeid, S., Salameh, P., & Hallit, S. (2021). Differences in the Associations between Body Dissatisfaction and Eating Outcomes by Gender? A Lebanese Population Study. <i>Revue D'epidemiologie Et De Sante Publique</i> , 69(3), 134–144. <a href="https://doi.org/10.1016/j.respe.2021.02.003">https://doi.org/10.1016/j.respe.2021.02.003</a> |
| Reason for exclusion: Proportion of disordered eating not shown.                                                                                                                                                                                                                                                                                                                                                                                 |
| Zhou, X., Schneider, S. C., Cepeda, S. L., & Storch, E. A. (2020). Orthorexia Nervosa in China: An Exploration of Phenomenology and Clinical Correlates Among University Students. <i>Journal of Cognitive Psychotherapy</i> , 34(3), 225–241. <a href="https://doi.org/10.1891/JCPSY-D-19-00027">https://doi.org/10.1891/JCPSY-D-19-00027</a>                                                                                                   |
| Reason for exclusion: Excluded due to data unavailability.                                                                                                                                                                                                                                                                                                                                                                                       |

**Table S3.** Characteristics of the studies using the <35 cut-off point (N=34).

| Reference                    | Year | Country          | Study design    | Total (n) | Women (%)    | Age (mean)   |
|------------------------------|------|------------------|-----------------|-----------|--------------|--------------|
| Abdullah et al.              | 2020 | Jordan           | Cross-sectional | 421       | 69.8         | 23.9         |
| Aiello et al.                | 2022 | Spain and Italy  | Cross-sectional | 160       | 57.5         | 24.1         |
| Almeida et al.               | 2018 | Portugal         | Cross-sectional | 193       | 58.5         | 32.8         |
| Bert et al.                  | 2019 | Italy            | Cross-sectional | 549       | 25.3         | 26.7         |
| Bo et al.                    | 2014 | Italy            | Cross-sectional | 440       | 54.1         | 19.8         |
| Carpita et al.               | 2021 | Italy            | Cross-sectional | 2426      | 65.5         | 26.9         |
| Dell'Osso et al.             | 2016 | Italy            | Cross-sectional | 2826      | 40.6         | 28.9         |
| Donini et al.                | 2005 | Italy            | Cross-sectional | 514       | Not reported | Not reported |
| Dunn et al.                  | 2017 | USA              | Cross-sectional | 275       | 66           | 21.7         |
| Gonidakis et al.             | 2020 | Greece           | Cross-sectional | 120       | Not reported | Not reported |
| Gorrasi et al.               | 2020 | Italy            | Cross-sectional | 918       | 54.8         | 20.2         |
| Guglielmetti et al.          | 2022 | Italy            | Cross-sectional | 671       | 53.9         | 21.0         |
| Gwioździk et al.             | 2022 | Poland           | Cross-sectional | 420       | 100          | 24.0         |
| Heiss et al.                 | 2019 | Not reported     | Cross-sectional | 381       | 80.8         | 31.0         |
| Herranz Valera et al.        | 2014 | Spain            | Cross-sectional | 136       | 65.4         | 36.7         |
| Hymnik et al.                | 2016 | Poland           | Cross-sectional | 1899      | 52.2         | 17.4         |
| Jerez et al.                 | 2015 | Chile            | Cross-sectional | 210       | 45.9         | 16.7         |
| Karniej et al.               | 2023 | Poland and Spain | Cross-sectional | 394       | 0            | 38.1         |
| Kujawowicz et al.            | 2022 | Poland           | Cross-sectional | 123       | 100          | 34.0         |
| Labossière & Thibault        | 2019 | Canada           | Cross-sectional | 133       | 71.4         | 21.3         |
| Lorenzon et al.              | 2020 | Brazil           | Cross-sectional | 480       | 56.7         | 35.3         |
| Łucka et al.                 | 2019 | Poland           | Cross-sectional | 864       | 69.3         | 19.8         |
| Maghetti et al.              | 2015 | Italy            | Cross-sectional | 517       | 53.8         | Not reported |
| Malmborg et al.              | 2017 | Sweden           | Cross-sectional | 207       | 56.5         | 22.8         |
| Martinovic et al.            | 2022 | Croatia          | Cross-sectional | 300       | 45           | 22.4         |
| Plichta & Jezewska-Zychowicz | 2019 | Poland           | Cross-sectional | 1120      | 70.4         | 21.4         |
| Raguzzini et al.             | 2021 | Italy            | Cross-sectional | 56        | 51.8         | 61.7         |
| Ramacciotti et al.           | 2011 | Italy            | Cross-sectional | 177       | 63.8         | 38.0         |
| Reynolds                     | 2018 | Australia        | Cross-sectional | 92        | 79.3         | 24.6         |
| Stochel et al.               | 2015 | Poland           | Cross-sectional | 399       | 53.4         | 16.9         |
| Surąła et al.                | 2020 | Not reported     | Cross-sectional | 273       | 45.8         | 20.9         |
| Turner & Lefevre             | 2017 | Not reported     | Cross-sectional | 680       | 100          | 24.7         |
| Uriegas et al.               | 2021 | USA              | Cross-sectional | 1090      | 69.4         | 19.6         |
| Voglino et al.               | 2021 | Italy            | Cross-sectional | 240       | 68.8         | 44.0         |

**Table S4.** Characteristics of the studies included using the <40 cut-off point (N=64).

| Reference             | Year | Country         | Study design       | Total (n) | Women (%)    | Age (mean)   |
|-----------------------|------|-----------------|--------------------|-----------|--------------|--------------|
| Abdullah et al.       | 2020 | Jordan          | Cross-sectional    | 421       | 69.8         | 23.9         |
| Aiello et al.         | 2022 | Spain and Italy | Cross-sectional    | 160       | 57.5         | 24.1         |
| Aksoydan & Camci      | 2009 | Turkey          | Cross-sectional    | 94        | 58.5         | 33.2         |
| Albery et al.         | 2020 | United Kingdom  | Experimental study | 80        | 75           | 29.4         |
| Almeida et al.        | 2018 | Portugal        | Cross-sectional    | 193       | 58.5         | 32.8         |
| Asil & Sürücüoğlu     | 2015 | Turkey          | Cross-sectional    | 117       | 86.3         | 34.0         |
| Athanasaki et al.     | 2023 | Greece          | Cross-sectional    | 96        | 95.8         | 23.4         |
| Bosi et al.           | 2007 | Turkey          | Cross-sectional    | 315       | 53.1         | 27.2         |
| Bergonzi & Massarollo | 2022 | Brazil          | Cross-sectional    | 61        | 95.1         | 23.0         |
| Bert et al.           | 2019 | Italy           | Cross-sectional    | 549       | 25.3         | 26.7         |
| Bién & Pieczykolan    | 2017 | Poland          | Cross-sectional    | 280       | 100          | Not reported |
| Clifford & Blyth      | 2019 | United Kingdom  | Case-control       | 215       | 65.6         | 21.0         |
| Cosentino et al.      | 2023 | Italy           | Cross-sectional    | 88        | Not reported | 40.0         |
| De Marchi & Baratto   | 2018 | Brazil          | Cross-sectional    | 82        | 93.9         | 21.0         |
| de Souza & Rodrigues  | 2014 | Brazil          | Cross-sectional    | 150       | 100          | 23.2         |
| Demir & Bayram        | 2022 | Turkey          | Cross-sectional    | 310       | 65.8         | 31.8         |
| Demirer & Yardımcı    | 2023 | Turkey          | Cross-sectional    | 197       | 53.3         | 30.6         |
| Donini et al.         | 2005 | Italy           | Cross-sectional    | 514       | NR           | Not reported |
| Dunn et al.           | 2017 | USA             | Cross-sectional    | 275       | 66           | 21.7         |
| Elias et al.          | 2022 | Brazil          | Cross-sectional    | 246       | 43.1         | Not reported |
| Erdogan et al.        | 2022 | Turkey          | Cross-sectional    | 159       | 100          | 33.2         |
| Ermumcu & Tek         | 2018 | Turkey          | Cross-sectional    | 132       | 100          | 31.7         |
| Farchakh et al.       | 2019 | Lebanon         | Cross-sectional    | 627       | 50.4         | 21.8         |
| Freire et al.         | 2020 | Brazil          | Cross-sectional    | 60        | 63.3         | 26.6         |
| Gonidakis et al.      | 2020 | Greece          | Cross-sectional    | 120       | Not reported | Not reported |
| Grajek et al.         | 2022 | Poland          | Cross-sectional    | 290       | 60.0         | 26.0         |
| Gubiec et al.         | 2015 | Poland          | Cross-sectional    | 155       | 90.3         | 22.1         |
| Haddad et al.         | 2019 | Lebanon         | Cross-sectional    | 589       | 66.5         | 27.6         |
| Hamid et al.          | 2018 | Malaysia        | Cross-sectional    | 138       | 88.4         | 21.8         |
| Hayles et al.         | 2017 | USA             | Cross-sectional    | 404       | 82.7         | 20.7         |
| Heiss et al.          | 2019 | Not reported    | Cross-sectional    | 381       | 80.8         | 31.0         |
| Herranz Valera et al. | 2014 | Spain           | Cross-sectional    | 136       | 65.4         | 36.7         |
| Karadağ et al.        | 2016 | Turkey          | Cross-sectional    | 750       | 50.0         | 25.8         |
| Koven & Senbonmatsu   | 2013 | USA             | Cross-sectional    | 100       | 79           | 19.3         |

|                              |      |                |                 |      |      |              |
|------------------------------|------|----------------|-----------------|------|------|--------------|
| Kujawowicz et al.            | 2022 | Poland         | Cross-sectional | 123  | 100  | 34.0         |
| Lemos et al.                 | 2018 | Brazil         | Cross-sectional | 95   | 100  | 20.5         |
| Lorenzon et al.              | 2020 | Brazil         | Cross-sectional | 430  | 56.7 | 35.3         |
| Łucka et al.                 | 2019 | Poland         | Cross-sectional | 864  | 69.3 | 19.8         |
| Maghetti et al.              | 2015 | Italy          | Cross-sectional | 517  | 53.8 | Not reported |
| Malmborg et al.              | 2017 | Sweden         | Cross-sectional | 207  | 56.5 | 22.8         |
| Mitrofanova et al. A         | 2021 | Greece         | Cross-sectional | 10   | 80   | 28.4         |
| Mitrofanova et al. B         | 2021 | United Kingdom | Cross-sectional | 50   | 60   | 34.0         |
| Penaforte et al.             | 2017 | Brazil         | Cross-sectional | 141  | 90.8 | 21.5         |
| Plichta & Jezewska-Zychowicz | 2019 | Poland         | Cross-sectional | 1120 | 70.4 | 21.4         |
| Raguzzini et al.             | 2021 | Italy          | Cross-sectional | 56   | 51.8 | 61.7         |
| Ramacciotti et al.           | 2011 | Italy          | Cross-sectional | 177  | 63.8 | 38.0         |
| Reynolds                     | 2018 | Australia      | Cross-sectional | 92   | 79.3 | 24.6         |
| Rizzieri et al.              | 2019 | Brazil         | Cross-sectional | 65   | 55.4 | 29.9         |
| Sampaio et al.               | 2022 | Brazil         | Cross-sectional | 150  | 74.7 | Not reported |
| Sanlier et al.               | 2016 | Turkey         | Cross-sectional | 900  | 58   | 20.4         |
| Stochel et al.               | 2015 | Poland         | Cross-sectional | 399  | 53.4 | 16.9         |
| Sünbül & Bayrak              | 2021 | Turkey         | Cross-sectional | 580  | 43.1 | 20.9         |
| Surafa et al.                | 2020 | Not reported   | Cross-sectional | 273  | 45.8 | 20.9         |
| Tocchetto et al.             | 2018 | Brazil         | Cross-sectional | 50   | 46.0 | 23.5         |
| Turner & Lefevre             | 2017 | Not reported   | Cross-sectional | 680  | 100  | 24.7         |
| Uriegas et al.               | 2021 | USA            | Cross-sectional | 1090 | 69.4 | 19.6         |
| Vaccari et al.               | 2021 | Italy          | Cross-sectional | 236  | 57.2 | 34.5         |
| Varga et al.                 | 2014 | Hungary        | Cross-sectional | 810  | 89.4 | 32.4         |
| Voglino et al.               | 2021 | Italy          | Cross-sectional | 240  | 68.8 | 44.0         |
| Yeşildemir & Tek             | 2022 | Turkey         | Cross-sectional | 206  | 50   | 26.2         |
| Yılmaz & Dundar              | 2022 | Turkey         | Cross-sectional | 248  | 41.9 | 42.6         |
| Yilmazel                     | 2021 | Turkey         | Cross-sectional | 969  | 63.9 | 21.4         |
| Yilmazel & Bozdogan          | 2020 | Turkey         | Cross-sectional | 420  | 46.2 | 43.4         |
| Zańko et al.                 | 2019 | Poland         | Cross-sectional | 87   | 87   | 21.0         |

**Table S5.** Results of the quality assessment checklist for studies.

| Reference                           | 1 | 2 | 3 | 4 | 5 | 6 | 7 | 8 | 9 | Total score | Summary on the overall risk of study bias |
|-------------------------------------|---|---|---|---|---|---|---|---|---|-------------|-------------------------------------------|
| Abdullah et al. (2020)              | 0 | 0 | 1 | 0 | 0 | 0 | 0 | 0 | 0 | 1           | Low risk                                  |
| Aiello et al. (2022)                | 1 | 0 | 1 | 0 | 0 | 0 | 0 | 0 | 1 | 3           | Low risk                                  |
| Aksoydan & Camci (2009)             | 1 | 1 | 1 | 0 | 0 | 0 | 0 | 0 | 0 | 3           | Low risk                                  |
| Albery et al. (2020)                | 1 | 0 | 1 | 0 | 0 | 0 | 0 | 0 | 0 | 2           | Low risk                                  |
| Almeida et al. (2018)               | 1 | 0 | 1 | 0 | 0 | 0 | 0 | 0 | 0 | 2           | Low risk                                  |
| Asil & Sürücüoğlu (2015)            | 1 | 0 | 1 | 0 | 0 | 0 | 0 | 1 | 1 | 4           | Moderate risk                             |
| Athanasaki et al. (2023)            | 1 | 0 | 1 | 0 | 0 | 0 | 0 | 0 | 0 | 2           | Low risk                                  |
| Bosi et al. (2007)                  | 1 | 0 | 1 | 0 | 0 | 0 | 0 | 0 | 0 | 2           | Low risk                                  |
| Bergonzi & Massarollo (2022)        | 1 | 0 | 1 | 0 | 0 | 0 | 0 | 0 | 0 | 2           | Low risk                                  |
| Bert et al. (2019)                  | 1 | 1 | 1 | 0 | 0 | 0 | 0 | 0 | 0 | 3           | Low risk                                  |
| Bién & Pieczykolan (2017)           | 1 | 1 | 1 | 0 | 0 | 0 | 0 | 0 | 0 | 3           | Low risk                                  |
| Bo et al. (2014)                    | 1 | 1 | 1 | 0 | 0 | 0 | 0 | 0 | 0 | 3           | Low risk                                  |
| Carpita et al. (2021)               | 1 | 0 | 1 | 0 | 0 | 0 | 0 | 0 | 0 | 2           | Low risk                                  |
| Clifford & Blyth (2019)             | 1 | 1 | 1 | 0 | 0 | 0 | 0 | 0 | 0 | 3           | Low risk                                  |
| Cosentino et al. (2023)             | 1 | 0 | 1 | 0 | 0 | 0 | 0 | 0 | 0 | 2           | Low risk                                  |
| De Marchi & Baratto (2018)          | 1 | 0 | 1 | 0 | 0 | 0 | 0 | 0 | 0 | 2           | Low risk                                  |
| de Souza & Rodrigues (2014)         | 1 | 0 | 1 | 0 | 0 | 0 | 0 | 0 | 0 | 2           | Low risk                                  |
| Dell'Osso et al. (2016)             | 1 | 0 | 1 | 0 | 0 | 0 | 0 | 0 | 1 | 3           | Low risk                                  |
| Demir & Bayram (2022)               | 1 | 1 | 0 | 0 | 0 | 0 | 0 | 0 | 0 | 2           | Low risk                                  |
| Demirer & Yardımcı (2023)           | 1 | 0 | 1 | 0 | 0 | 0 | 0 | 0 | 0 | 2           | Low risk                                  |
| Donini et al. (2005)                | 1 | 0 | 0 | 0 | 0 | 0 | 0 | 0 | 0 | 1           | Low risk                                  |
| Dunn et al. (2017)                  | 1 | 0 | 0 | 0 | 0 | 0 | 0 | 0 | 0 | 1           | Low risk                                  |
| Elias et al. (2022)                 | 1 | 1 | 1 | 0 | 0 | 0 | 0 | 0 | 0 | 3           | Low risk                                  |
| Erdogan et al. (2022)               | 1 | 1 | 1 | 0 | 0 | 0 | 0 | 0 | 0 | 3           | Low risk                                  |
| Ermumcu & Tek (2018)                | 1 | 1 | 1 | 0 | 0 | 0 | 0 | 0 | 0 | 3           | Low risk                                  |
| Farchakh et al. (2019)              | 0 | 0 | 0 | 0 | 0 | 0 | 0 | 0 | 0 | 0           | Low risk                                  |
| Freire et al. (2020)                | 1 | 1 | 1 | 0 | 0 | 0 | 0 | 0 | 0 | 3           | Low risk                                  |
| Gorrasi et al. (2020)               | 1 | 1 | 1 | 0 | 0 | 0 | 0 | 0 | 0 | 3           | Low risk                                  |
| Gonidakis et al. (2020)             | 1 | 0 | 1 | 0 | 0 | 0 | 0 | 0 | 0 | 2           | Low risk                                  |
| Grajek et al. (2022)                | 1 | 1 | 1 | 0 | 0 | 0 | 0 | 0 | 0 | 3           | Low risk                                  |
| Gubiec et al. (2015)                | 1 | 0 | 1 | 0 | 0 | 0 | 0 | 0 | 0 | 2           | Low risk                                  |
| Guglielmetti et al. (2022)          | 1 | 1 | 1 | 0 | 0 | 0 | 0 | 0 | 0 | 3           | Low risk                                  |
| Gwóździk et al. (2022)              | 1 | 0 | 0 | 0 | 0 | 0 | 0 | 0 | 0 | 1           | Low risk                                  |
| Haddad et al. (2019)                | 0 | 0 | 0 | 0 | 0 | 0 | 0 | 0 | 0 | 0           | Low risk                                  |
| Hamid et al. (2018)                 | 1 | 0 | 1 | 0 | 0 | 0 | 0 | 0 | 0 | 2           | Low risk                                  |
| Hayles et al. (2017)                | 1 | 0 | 1 | 0 | 0 | 0 | 0 | 0 | 0 | 2           | Low risk                                  |
| Heiss et al. (2019)                 | 1 | 0 | 1 | 1 | 0 | 0 | 0 | 0 | 0 | 3           | Low risk                                  |
| Herranz Valera et al. (2014)        | 1 | 0 | 1 | 0 | 0 | 0 | 0 | 0 | 0 | 2           | Low risk                                  |
| Hyrnik et al. (2016)                | 1 | 0 | 0 | 1 | 0 | 0 | 0 | 0 | 0 | 2           | Low risk                                  |
| Jerez et al. (2015)                 | 1 | 0 | 1 | 0 | 0 | 0 | 0 | 0 | 1 | 3           | Low risk                                  |
| Karadağ et al. (2016)               | 1 | 0 | 0 | 0 | 0 | 0 | 0 | 0 | 0 | 1           | Low risk                                  |
| Karniej et al. (2023)               | 0 | 0 | 1 | 0 | 0 | 0 | 0 | 0 | 0 | 1           | Low risk                                  |
| Koven & Senbonmatsu (2013)          | 1 | 0 | 1 | 0 | 0 | 0 | 0 | 0 | 0 | 2           | Low risk                                  |
| Kujawowicz et al. (2022)            | 1 | 0 | 1 | 0 | 0 | 0 | 0 | 0 | 0 | 2           | Low risk                                  |
| Labossière & Thibault (2019)        | 1 | 0 | 1 | 0 | 0 | 0 | 0 | 0 | 0 | 2           | Low risk                                  |
| Lemos et al. (2018)                 | 1 | 0 | 1 | 0 | 0 | 0 | 0 | 0 | 0 | 2           | Low risk                                  |
| Lorenzon et al. (2020)              | 1 | 0 | 1 | 0 | 0 | 0 | 0 | 0 | 0 | 2           | Low risk                                  |
| Łucka et al. (2019)                 | 1 | 0 | 0 | 0 | 0 | 0 | 0 | 0 | 0 | 1           | Low risk                                  |
| Maghetti et al. (2015)              | 0 | 0 | 0 | 0 | 0 | 0 | 0 | 0 | 0 | 0           | Low risk                                  |
| Malmborg et al. (2017)              | 1 | 1 | 1 | 0 | 0 | 0 | 0 | 0 | 0 | 3           | Low risk                                  |
| Martinovic et al. (2022)            | 0 | 0 | 0 | 0 | 0 | 0 | 0 | 0 | 0 | 0           | Low risk                                  |
| Mitrofanova et al. (2021) A         | 1 | 0 | 1 | 0 | 0 | 0 | 0 | 0 | 0 | 2           | Low risk                                  |
| Mitrofanova et al. (2021) B         | 1 | 1 | 1 | 0 | 0 | 0 | 0 | 1 | 0 | 4           | Moderate risk                             |
| Penaforte et al. (2017)             | 1 | 0 | 1 | 0 | 0 | 0 | 0 | 0 | 0 | 2           | Low risk                                  |
| Plichta & Jezewska-Zychowicz (2019) | 0 | 0 | 1 | 0 | 0 | 0 | 0 | 0 | 0 | 1           | Low risk                                  |
| Raguzzini et al. (2021)             | 1 | 0 | 1 | 0 | 0 | 0 | 0 | 0 | 0 | 2           | Low risk                                  |
| Ramacciotti et al. (2011)           | 0 | 0 | 0 | 0 | 0 | 0 | 0 | 0 | 0 | 0           | Low risk                                  |
| Reynolds (2018)                     | 1 | 0 | 1 | 0 | 0 | 0 | 0 | 0 | 0 | 2           | Low risk                                  |
| Rizzieri et al. (2019)              | 1 | 0 | 1 | 0 | 0 | 0 | 0 | 0 | 0 | 2           | Low risk                                  |
| Sampaio et al. (2022)               | 1 | 1 | 1 | 0 | 0 | 0 | 0 | 0 | 0 | 3           | Low risk                                  |
